# Supplementary material
Source: publisher figshare collection journal article supplement (https://tandf.figshare.com/ndownloader/files/20103866)
Supplement: Supplementary file 1 [file 20103866]

**Figure S1.** Reduction of Fusarium wilt incidence on watermelon by *Pseudomonas* strains WMC16-1-1, WMC16-1-8, and WMC16-2-5 under greenhouse conditions. Values are means of two repeated experiments. Bars marked with different letters are significantly different at *P* ≤ 0.05.
